# Supplementary material
Source: Springer Nature journal article supplement (https://www.springermedizin.de/resource/supplementary/12889_2012_4616_MOESM2_ESM.pdf/9493240)
Supplement: MOESM2 [file 9493240]

## Additional file 2

**Table Disease Model Parameters and Values: non-scenario specific values  
The AsiaFluCap Simulator**

| SEIR<br>parameter              | Description                                                                                                      | Chosen<br>value*       | Justification/notes                                                                                                                                                                                                                                                  |
|--------------------------------|------------------------------------------------------------------------------------------------------------------|------------------------|----------------------------------------------------------------------------------------------------------------------------------------------------------------------------------------------------------------------------------------------------------------------|
| $\kappa$                       | Rate of daily contacts possibly resulting in transmission                                                        | 7                      | Assumption for the model.                                                                                                                                                                                                                                            |
| $\sigma$                       | Rate at which individuals leave exposed group                                                                    | 1                      | 1-2 days [1], 2.62 days [2], and 1-5 days [3] between infection and symptom onset.                                                                                                                                                                                   |
| $\delta$                       | Rate at which individuals leave asymptomatic group                                                               | 1/0.4                  | 1 day [2, 3], and 0-2 days [3] infectious before symptom onset.                                                                                                                                                                                                      |
| $\tau$                         | Rate cases get detected                                                                                          | 1/0.5                  | Assumption for the model.                                                                                                                                                                                                                                            |
| $\gamma_a$                     | Rate at which asymptomatic cases leave infectious group                                                          | 2                      | 1.9 days [4], 3.38 days [2], 4-10 days [3] mean duration of infectivity.                                                                                                                                                                                             |
| $\gamma_m$                     | Rate at which mild cases leave infectious group                                                                  | 1/1.5                  | See above [2, 3, 5].                                                                                                                                                                                                                                                 |
| $\gamma_c$                     | Rate at which severe cases leave infected group                                                                  | 1/3.5                  | See above [2, 3, 5].                                                                                                                                                                                                                                                 |
| $\gamma_{ma}$<br>$\gamma_{ca}$ | Rate at which mild and critical cases under AV treatment leave infectious groups                                 | 1/2.5                  | Infectious period under AV treatment reduced by 1 day [6].                                                                                                                                                                                                           |
| $\gamma_h$                     | Rate at which cases leave hospital group                                                                         | 1/12                   | Length of ICU stay 13.5 days [5].                                                                                                                                                                                                                                    |
| $\gamma_v$                     | Rate at which cases leave ventilated group                                                                       | 1/13                   | 12 days [7], 15 days [8].                                                                                                                                                                                                                                            |
| $q$                            | Proportion of contacts resulting in transmission                                                                 | $q = R_0\gamma/\kappa$ | Value estimated based on chosen $R_0$ (which can be varied in interface between 1.2-2.5 [9]), taking into account contacts per day ( $\kappa$ ) and different infectious periods of case groups ( $\gamma$ 's) which are weighted according to the case proportions. |
| $p_\kappa$                     | Proportion of contacts reduced during contact reduction period (when prevalence of symptomatic cases $>0.5\%$ ). | 0.10                   | Value set to 0.10 for all baseline scenarios, which gives more realistic attack rates for given $R_0$ values (since we have homogenous mixing). Users can change proportion in interface between 0 and 0.10.                                                         |
| $p_{qh}$                       | Proportion of hospital                                                                                           | 0                      | Value set to 0 for baseline scenario. Users                                                                                                                                                                                                                          |

|          |                                                                                                                                              |   |                                                                                                                                                                                                     |
|----------|----------------------------------------------------------------------------------------------------------------------------------------------|---|-----------------------------------------------------------------------------------------------------------------------------------------------------------------------------------------------------|
|          | transmissions reduced (e.g. due to case isolation or use of PPE by hospital staff)                                                           |   | can change proportion in interface between 0 and 1.                                                                                                                                                 |
| $P_{ma}$ | Proportion of mild cases treated with antivirals                                                                                             | 0 | Value set to 0 for baseline scenario. Users can change proportion in interface between 0 and 1.                                                                                                     |
| $P_{ca}$ | Proportion of critical outpatients treated with antivirals                                                                                   | 1 | For the baseline scenario it is assumed that only critical cases are treated with antivirals. Users can change proportion of critical outpatient receiving antivirals in interface between 0 and 1. |
| $\rho$   | Rate at which susceptible individuals leave susceptible compartment through vaccination (number of individuals that are vaccinated per day). | 0 | Vaccination was not included in baseline scenario. Number of individuals that can be vaccinated per day can be changed by users in the interface.                                                   |

\*All parameter values can be changed, either in interface or in the SEIR Model sheet of the AsiaFluCap Simulator.

## References

1. Longini IM, Jr., Nizam A, Xu S, Ungchusak K, Hanshaoworakul W, Cummings DA, Halloran ME: **Containing pandemic influenza at the source.** *Science* 2005, **309**(5737):1083-1087.
2. Tuite AR, Greer AL, Whelan M, Winter AL, Lee B, Yan P, Wu J, Moghadas S, Buckeridge D, Pourbohloul B *et al*: **Estimated epidemiologic parameters and morbidity associated with pandemic H1N1 influenza.** *Cmaj* 2009, **182**(2):131-136.
3. Pourbohloul B, Ahued A, Davoudi B, Meza R, Meyers LA, Skowronski DM, Villasenor I, Galvan F, Cravioto P, Earn DJ *et al*: **Initial human transmission dynamics of the pandemic (H1N1) 2009 virus in North America.** *Influenza Other Respi Viruses* 2009, **3**(5):215-222.
4. Flahault A, Vergu E, Boelle PY: **Potential for a global dynamic of Influenza A (H1N1).** *BMC Infect Dis* 2009, **9**:129.
5. Dominguez-Cherit G, Lapinsky SE, Macias AE, Pinto R, Espinosa-Perez L, de la Torre A, Poblano-Morales M, Baltazar-Torres JA, Bautista E, Martinez A *et al*: **Critically ill patients with 2009 influenza A(H1N1) in Mexico.** *Jama* 2009, **302**(17):1880-1887.
6. Fraser C, Riley S, Anderson RM, Ferguson NM: **Factors that make an infectious disease outbreak controllable.** *Proc Natl Acad Sci U S A* 2004, **101**(16):6146-6151.
7. Kumar A, Zarychanski R, Pinto R, Cook DJ, Marshall J, Lacroix J, Stelfox T, Bagshaw S, Choong K, Lamontagne F *et al*: **Critically ill patients with 2009 influenza A(H1N1) infection in Canada.** *JAMA* 2009, **302**(17):1872-1879.

8. Jain S, Kamimoto L, Bramley AM, Schmitz AM, Benoit SR, Louie J, Sugerman DE, Druckenmiller JK, Ritger KA, Chugh R *et al*: **Hospitalized patients with 2009 H1N1 influenza in the United States, April-June 2009**. *N Engl J Med* 2009, **361**(20):1935-1944.
9. van der Weijden CP, Stein ML, Jacobi AJ, Kretzschmar MEE, Reintjes R, van Steenbergen JE, Timen A: **Choosing pandemic parameters for pandemic preparedness planning: A comparison of pandemic scenarios prior to and following the influenza A(H1N1) 2009 pandemic**. In: *Health Policy*. 2012.
